# Supplementary material
Source: PubMed Central journal article supplement (PMC7904957)
Supplement: NIHMS1660952-supplement-Table_S1.pdf [file NIHMS1660952-supplement-Table_S1.pdf]

| genes      | chr | pos      | ref | alt | worst_annotation   | gnomad-exc | gnomad-ger | topmed    | polyphen | sift |
|------------|-----|----------|-----|-----|--------------------|------------|------------|-----------|----------|------|
| KLHDC4     | 16  | 87742977 | A   | G   | synonymous_variant | 0.0050395  | 0.0048534  | 0.0054393 |          |      |
| PIEZO1     | 16  | 88793220 | G   | A   | missense_variant   | 0.0007943  | 0.0011321  | 0.0005654 |          |      |
| GALNS,TRAP | 16  | 88923563 | C   | G   | missense_variant   | 9.74E-06   | 0          | 0         |          |      |

|                 |           | l1.4 | l1.4_gq | l1.4_dp | l1.2 | l1.2_gq | l1.2_dp | l1.3 | l1.3_gq | l1.3_dp | l1.2 | l1.2_gq | l1.2_dp |
|-----------------|-----------|------|---------|---------|------|---------|---------|------|---------|---------|------|---------|---------|
| muttaster       | fathmm    | G/G  | 99      | 38      | G/G  | 99      | 39      | G/G  | 99      | 45      | A/G  | 99      | 45      |
| disease_causing | tolerated | A/A  | 99      | 38      | A/A  | 99      | 40      | A/A  | 99      | 44      | G/A  | 99      | 41      |
| disease_causing | damaging  | G/G  | 99      | 45      | G/G  | 99      | 33      | G/G  | 99      | 44      | C/G  | 99      | 51      |

| l.1 | l.1_gq | l.1_dp |
|-----|--------|--------|
| A/G | 99     | 39     |
| G/A | 99     | 35     |
| C/G | 99     | 54     |
